# Supplementary material for: Working Memory Performance Under Stress
Source: Atypon-hosted journal article supplement (doi:10.1027/1618-3169/a000484), 2020-03-01
Supplement: 1618-3169_a000484_esm1.pdf [file 1618-3169_a000484_esm1.pdf]

**Electronic Supplementary Material**

Table 1a-c: Intercorrelations between working memory parameters and change in cortisol ( $\Delta\text{cort}$ )

**a) Overall sample (N=75)**

|                     |          | $\Delta\text{cort}$ | CRpre        | CRpost       | $\Delta\text{CR}$ | RTpre        | RTpost       | $\Delta\text{RT}$ |
|---------------------|----------|---------------------|--------------|--------------|-------------------|--------------|--------------|-------------------|
| $\Delta\text{cort}$ | <i>r</i> | 1                   |              |              |                   |              |              |                   |
|                     | <i>p</i> |                     |              |              |                   |              |              |                   |
| CRpre               | <i>r</i> | .04                 | 1            |              |                   |              |              |                   |
|                     | <i>p</i> | .75                 |              |              |                   |              |              |                   |
| CRpost              | <i>r</i> | .04                 | <b>.59**</b> | 1            |                   |              |              |                   |
|                     | <i>p</i> | .73                 | <b>0.00</b>  |              |                   |              |              |                   |
| $\Delta\text{CR}$   | <i>r</i> | .01                 | <b>-.23*</b> | <b>.65**</b> | 1                 |              |              |                   |
|                     | <i>P</i> | .91                 | <b>.05</b>   | <b>.001</b>  |                   |              |              |                   |
| RTpre               | <i>r</i> | .18                 | -.06         | -.13         | -.10              | 1            |              |                   |
|                     | <i>p</i> | .12                 | .62          | .27          | .40               |              |              |                   |
| RTpost              | <i>r</i> | .16                 | .00          | -.15         | -.17              | <b>.84**</b> | 1            |                   |
|                     | <i>p</i> | .17                 | .98          | .21          | .14               | <b>.001</b>  |              |                   |
| $\Delta\text{RT}$   | <i>r</i> | -.03                | .09          | -.04         | -.13              | <b>-.26*</b> | <b>.31**</b> | 1                 |
|                     | <i>p</i> | .78                 | .42          | .75          | .26               | <b>.02</b>   | <b>.01</b>   |                   |

**b) Women (n=43)**

|                     |          | $\Delta\text{cort}$ | CRpre        | CRpost       | $\Delta\text{CR}$ | RTpre        | RTpost      | $\Delta\text{RT}$ |
|---------------------|----------|---------------------|--------------|--------------|-------------------|--------------|-------------|-------------------|
| $\Delta\text{cort}$ | <i>r</i> | 1                   |              |              |                   |              |             |                   |
|                     | <i>p</i> |                     |              |              |                   |              |             |                   |
| CRpre               | <i>r</i> | .19                 | 1            |              |                   |              |             |                   |
|                     | <i>p</i> | .22                 |              |              |                   |              |             |                   |
| CRpost              | <i>r</i> | <b>.39**</b>        | <b>.45**</b> | 1            |                   |              |             |                   |
|                     | <i>p</i> | <b>.01</b>          | <b>.001</b>  |              |                   |              |             |                   |
| $\Delta\text{CR}$   | <i>r</i> | .25                 | <b>-.34*</b> | <b>.69**</b> | 1                 |              |             |                   |
|                     | <i>p</i> | .10                 | <b>.03</b>   | <b>.001</b>  |                   |              |             |                   |
| RTpre               | <i>r</i> | .07                 | -.12         | -.05         | .04               | 1            |             |                   |
|                     | <i>p</i> | .66                 | .44          | .74          | .79               |              |             |                   |
| RTpost              | <i>r</i> | .03                 | -.03         | -.07         | -.04              | <b>.85**</b> | 1           |                   |
|                     | <i>p</i> | .84                 | .83          | .66          | .78               | 0.00         |             |                   |
| $\Delta\text{RT}$   | <i>r</i> | -.06                | .15          | -.03         | -.16              | -.21         | <b>.36*</b> | 1                 |
|                     | <i>p</i> | .69                 | .34          | .84          | .32               | .19          | <b>.02</b>  |                   |

**c) Men (n=32)**

|               |          | $\Delta$ cort | CRpre        | CRpost       | $\Delta$ CR  | RTpre        | RTpost | $\Delta$ RT |
|---------------|----------|---------------|--------------|--------------|--------------|--------------|--------|-------------|
| $\Delta$ cort | <i>r</i> | 1             |              |              |              |              |        |             |
|               | <i>p</i> |               |              |              |              |              |        |             |
| CRpre         | <i>r</i> | -.12          | 1            |              |              |              |        |             |
|               | <i>p</i> | .52           |              |              |              |              |        |             |
| CRpost        | <i>r</i> | <b>-.36*</b>  | <b>.72**</b> | 1            |              |              |        |             |
|               | <i>p</i> | <b>.04</b>    | <b>.001</b>  |              |              |              |        |             |
| $\Delta$ CR   | <i>r</i> | <b>-.38*</b>  | -.09         | <b>.63**</b> | 1            |              |        |             |
|               | <i>p</i> | <b>.03</b>    | .63          | <b>.001</b>  |              |              |        |             |
| RTpre         | <i>r</i> | <b>.40*</b>   | 0.00         | -.25         | <b>-.36*</b> | 1            |        |             |
|               | <i>p</i> | <b>.02</b>    | 1.00         | .16          | <b>.04</b>   |              |        |             |
| RTpost        | <i>r</i> | <b>.43*</b>   | .01          | -.29         | <b>-.43*</b> | <b>.82**</b> | 1      |             |
|               | <i>p</i> | <b>.01</b>    | .95          | .10          | <b>0.01</b>  | <b>0.00</b>  |        |             |
| $\Delta$ RT   | <i>r</i> | .02           | .02          | -.05         | -.09         | <b>-.37*</b> | .23    | 1           |
|               | <i>p</i> | .93           | .91          | .81          | .63          | <b>.04</b>   | .20    |             |

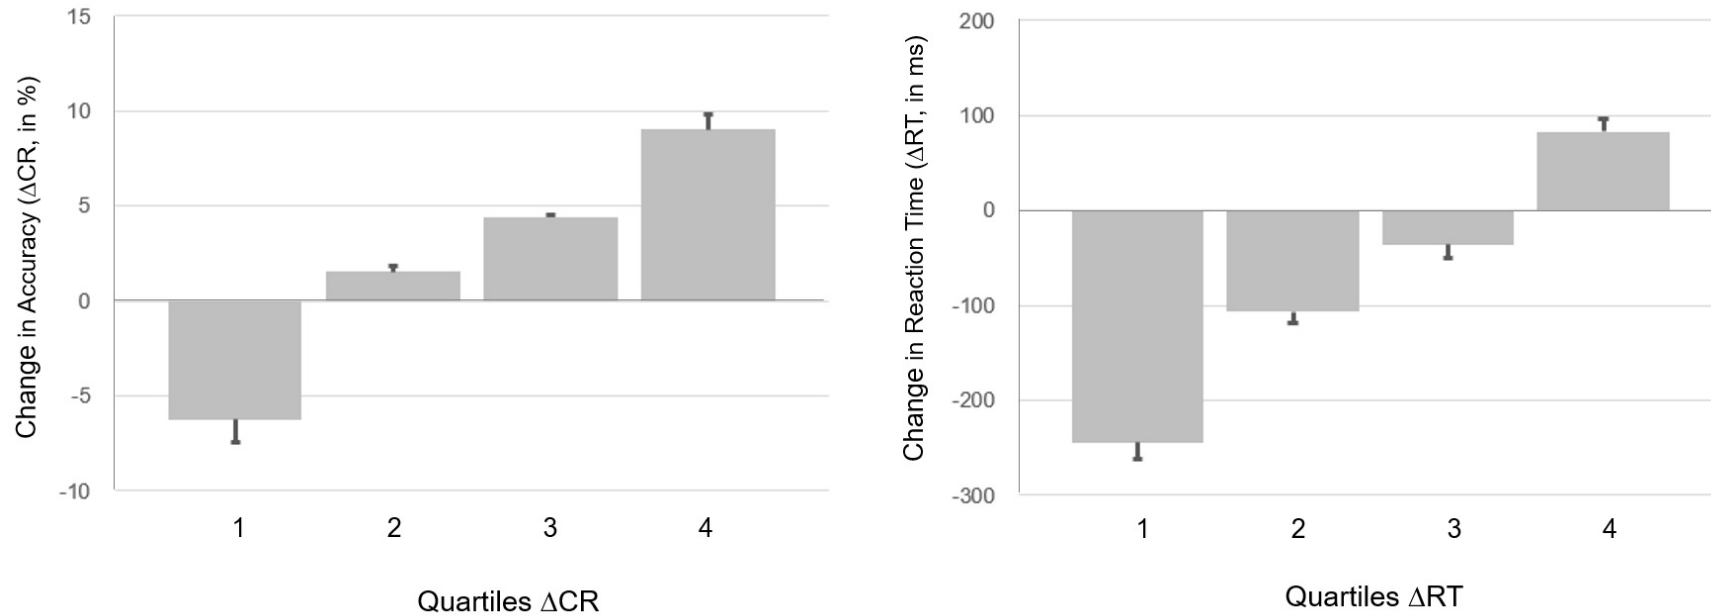

*Figure 1 ESM:* Changes in correct responses of the n-back working memory task before and after stress ( $\Delta$ CR, left) and reaction time ( $\Delta$ RT, right), illustrated as quartiles. The x-axis shows the subjects ( $n=75$ , both men and women) in quartiles 1 to 4 in terms of change in accuracy (in percent, left panel), and change in reaction time (in msec, right panel). Error bars shown are standard error of mean.
